# Supplementary material for: Heparan sulfate proteoglycans (HSPGs) and chondroitin sulfate proteoglycans (CSPGs) function as endocytic receptors for an internalizing anti-nucleic acid antibody
Source: PubMed Central journal article supplement (PMC5662561; doi:10.1038/s41598-017-14793-z), 2017-10-30
Supplement: 41598_2017_14793_MOESM1_ESM.pdf [file 41598_2017_14793_MOESM1_ESM.pdf]

## Supporting information for

### **Heparan sulfate proteoglycans (HSPGs) and chondroitin sulfate proteoglycans (CSPGs) function as endocytic receptors for an internalizing anti-nucleic acid antibody**

Hyunjoon Park<sup>a,¶</sup>, Minjae Kim<sup>a,¶</sup>, Hye-Jin Kim<sup>a</sup>, Yeonjin Lee<sup>a</sup>, Youngsil Seo<sup>a</sup>, Chuong D. Pham<sup>a</sup>,  
Joungmin Lee<sup>a</sup>, Sung-June Byun<sup>c</sup>, and Myung-Hee Kwon<sup>a,b,\*</sup>

<sup>a</sup>Department of Biomedical Sciences, Graduate School, Ajou University, 206 World cup-ro, Yeongtong-gu, Suwon 443-749, South Korea.

<sup>b</sup>Department of Microbiology, Ajou University School of Medicine, 206 World cup-ro, Yeongtong-gu, Suwon 443-749, South Korea.

<sup>c</sup>Animal Biotechnology Division, National Institute of Animal Science, RDA, 1500, Kongjwipatjwi-ro, Iseo-myeon, Wanju-gun, Jeollabuk-do, 565-851, South Korea

\*Correspondence to Myung-Hee Kwon: Department of Microbiology, Ajou University School of Medicine, Woncheon-dong 5, Suwon 443-749, Korea.

Tel.: +82-(31)-219-5074; FAX: +82-(31)-219-5079; E-mail: [kwonmh@ajou.ac.kr](mailto:kwonmh@ajou.ac.kr).

¶These authors contributed equally to this work.

#### **Supporting information contains:**

Supplementary Figure 1 (Fig. S1) and legend

Supplementary Figure 2 (Fig. S2) and legend

Fig. S1

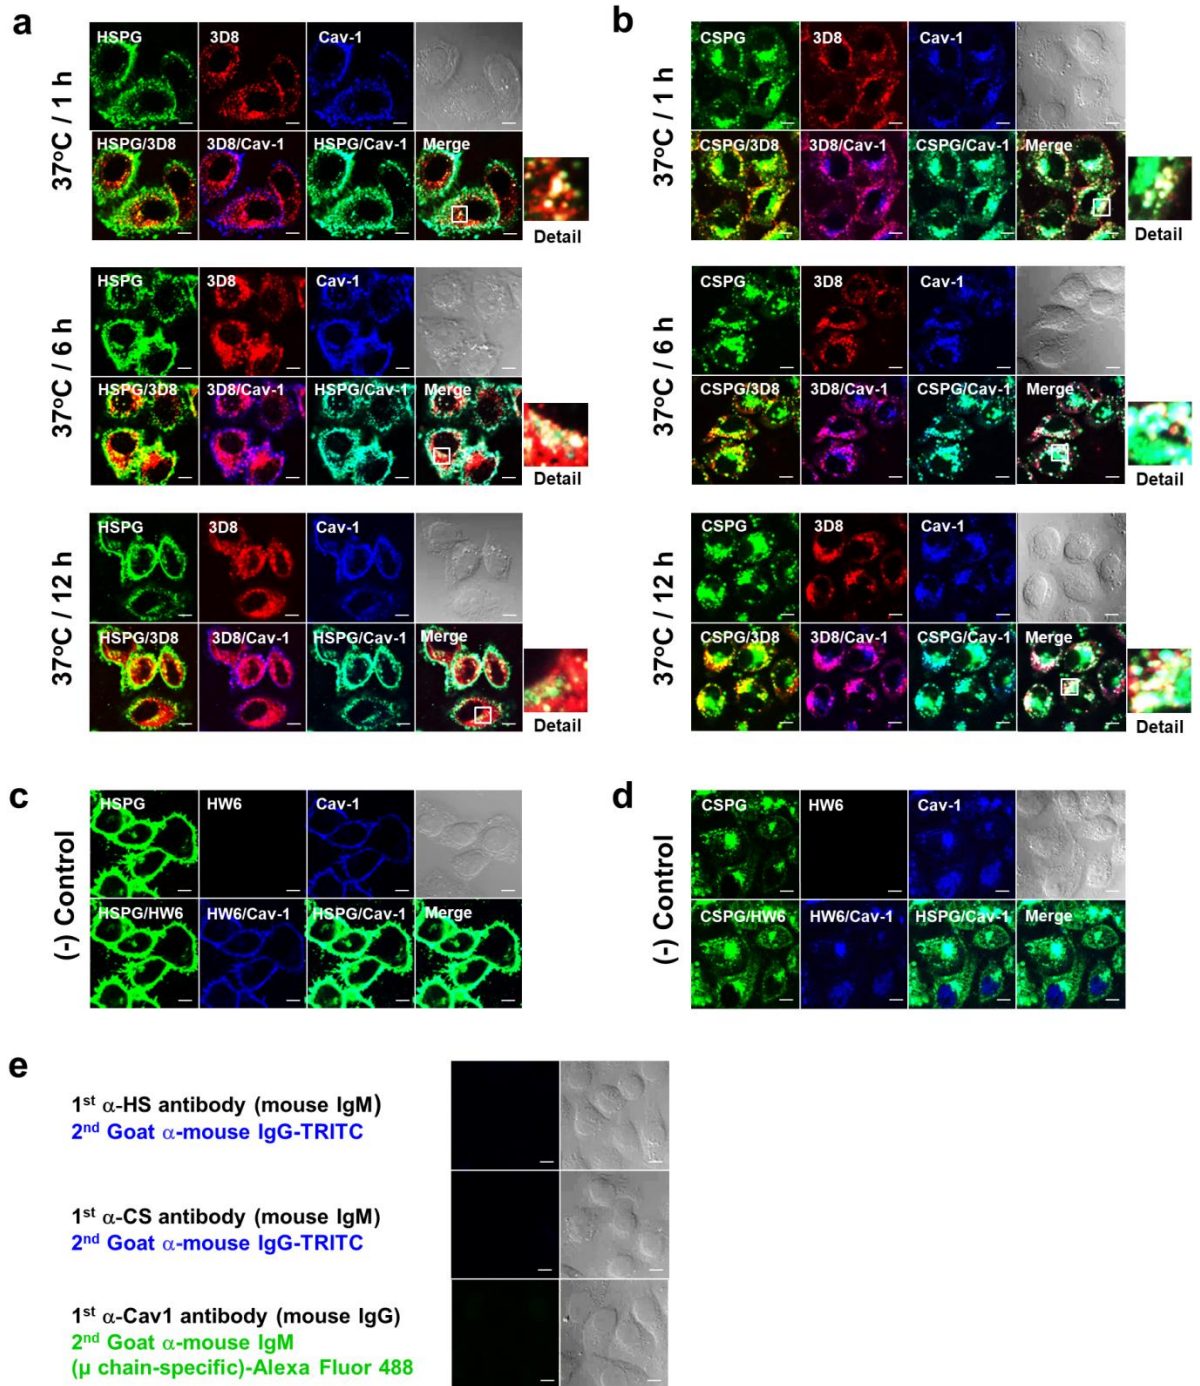

**Supplementary Fig. S1. Intracellular colocalization of 3D8 scFv with proteoglycans (HSPGs and CSPGs) and caveolin-1.** (a, b) Confocal microscopy was used to detect intracellular colocalization of 3D8 scFv, proteoglycans (HSPGs and CSPGs), and caveolin-1. HeLa cells were incubated for 1 h, 6 h, or 12 h at 37°C with 3D8 scFv (10 µM). After fixation and permeabilization, cells were incubated overnight at 4°C with a primary antibody mixture comprising rabbit (IgG) anti-3D8 scFv, mouse (IgG) anti-caveolin-1 (Santa Cruz, cat# sc-53564), and mouse (IgM) anti-HS (US biological, cat# H1890) antibodies (a), or with an antibody mixture comprising rabbit anti-3D8 scFv, mouse (IgG) anti-caveolin-1, and mouse (IgM) anti-CS (Abcam, cat# ab11570) antibodies (b). Thereafter, cells were incubated with a secondary antibody mixture comprising Alexa Fluor 647-conjugated goat anti-rabbit IgG (Invitrogen, cat# A21244), TRITC-conjugated goat anti-mouse IgG (Santa Cruz, cat# sc-3796), and Alexa Fluor 488-conjugated goat anti-mouse IgM/ $\mu$  chain-specific antibodies (Invitrogen, cat# A21042). The boxed area is enlarged in the right panel. (c, d) HeLa cells were incubated for 6 h at 37°C with HW6 (a non-internalizing scFv antibody used as a negative control), followed by incubation with rabbit anti-His tag and Alexa Fluor 647-conjugated goat anti-rabbit IgG. (e) Confocal microscopy of negative controls shows no cross-reactivity between mouse antibodies used for co-staining [anti-HS or anti-CS (mouse IgM antibodies) and the anti-caveolin (mouse IgG) antibody]. HeLa cells were fixed, permeabilized, and then incubated overnight at 4°C with a mouse (IgM) anti-HS antibody (upper panel), a mouse (IgM) anti-CS antibody (middle panel), or a mouse (IgG) anti-caveolin antibody (lower panel). Thereafter, cells were incubated with TRITC-conjugated goat anti-mouse IgG (upper and middle panels) or an Alexa Fluor 488-conjugated goat anti-mouse IgM/ $\mu$  chain-specific antibody (lower panel). *Bar*, 10 µm.

Fig. S2

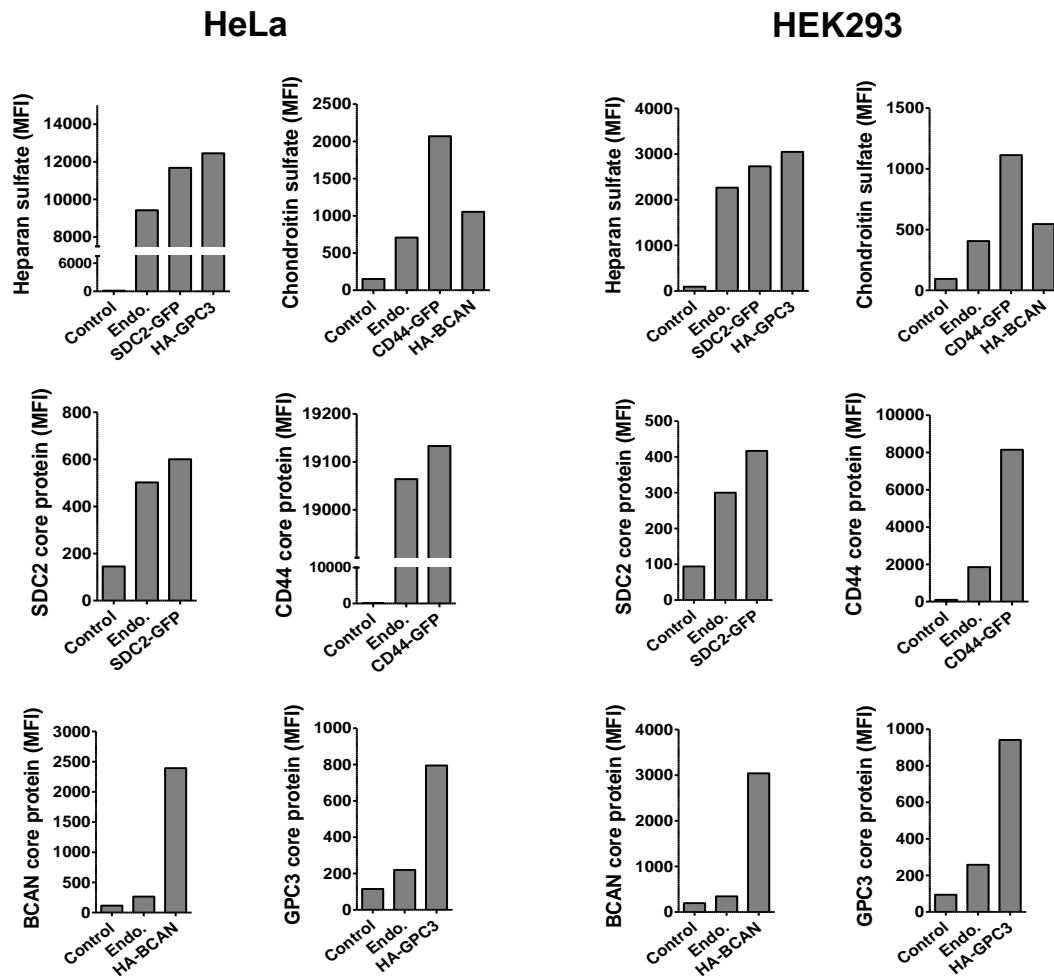

**Supplementary Fig. S2. Flow cytometry to examine expression of GAGs and core proteins in cells transfected with HSPGs (SDC2 and GPC3) and CSPGs (CD44 and BCAN).** HeLa and HEK293 cells were transfected with plasmids encoding SDC2-GFP, HA-GPC3, CD44-GFP, or HA-BCAN. After 24 h, the cells were dissociated with non-enzymatic cell dissociation solution (Sigma, cat# C5914), washed three times with cold phosphate-buffered saline (PBS), and fixed in 4% paraformaldehyde in PBS for 10 min at room temperature. In the experiment to detect increased expression of GAG by transfectants, cells were incubated overnight at 4°C with mouse anti-HS IgM (US Biological, cat# H1890) or mouse anti-CS IgM (Abcam, cat# ab11570) diluted in surface buffer (0.5% BSA and 2 mM EDTA prepared in PBS, pH 8.5). After washing, cells were incubated for 1 h at 4°C with an AlexaFluor 647-conjugated rat anti-mouse IgM/ $\mu$  chain-specific antibody (BioLegend,

cat# 406526) diluted in surface buffer. In the experiment to detect increase expression of core protein by transfectants, cells transfected with plasmids expressing HA-GPC3 and HA-BCAN were incubated with mouse anti-GPC3 IgG (Santa Cruz, cat# sc-65443) or mouse anti-BCAN IgG (Abnova, cat# H00063827-B01P), followed by AlexaFluor 488-goat anti-mouse IgG (Invitrogen, cat# A10680). Cells transfected with plasmids expressing SDC2-GFP and CD44-GFP were incubated with mouse anti-SDC2 IgM (Santa Cruz, cat# sc-376229) or mouse anti-CD44 IgG (Abnova, cat# abx19050), followed by an AlexaFluor 647-conjugated rat anti-mouse IgM/ $\mu$  chain-specific antibody (BioLegend, cat# 406526). After washing, cells were resuspended in 4% paraformaldehyde and analyzed by flow cytometry using a FACSCanto II cytometer (BD Biosciences). SDC2, syndecan 2; GPC3, glypican 3; BCAN, brevican; MFI, mean fluorescence intensity.
